# Supplementary material for: Characterization of VAMP isoforms in 3T3-L1 adipocytes: implications for GLUT4 trafficking
Source: PubMed Central journal article supplement — Mol Biol Cell. 2015 Feb 1;26(3):530–6. doi: 10.1091/mbc.E14-09-1368 (PMC4310743; doi:10.1091/mbc.e14-09-1368), 2015-02-01
Supplement: supp_E14-09-1368v1_CombinedSupMats.pdf [file supp_E14-09-1368v1_CombinedSupMats.pdf]

# Supplemental Materials

*Molecular Biology of the Cell*

Sadler et al.

A

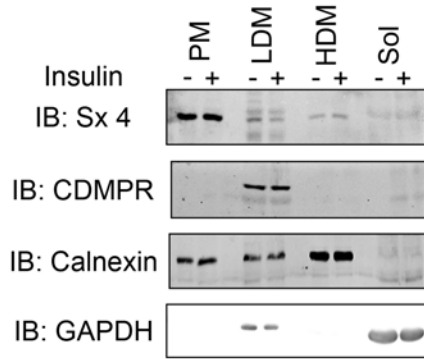

B

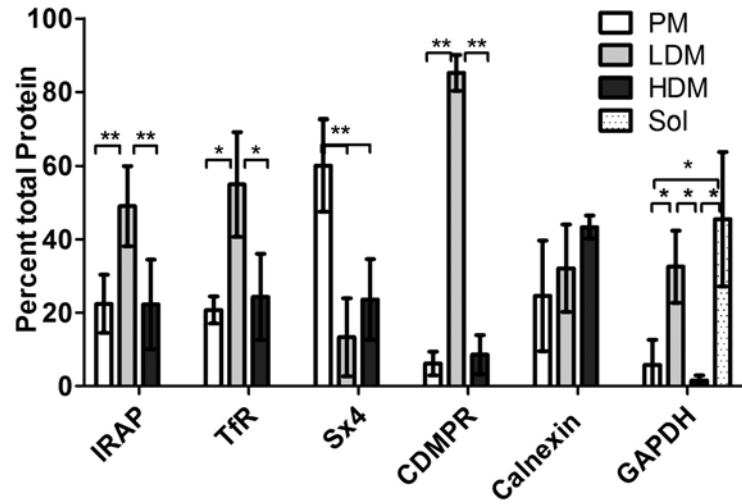

**Supplemental Figure 1 - Distribution of Marker Proteins in the Subcellular Fractions.**

Samples identical to those used in Figure 3 were immunoblotted with the antibodies indicated. Sx4 is used here as a marker for the PM, Calnexin for ER (present in HDM fractions) and CD-MPR for LDMs. Representative blots are shown in A, panel B shows quantification of four experiments of this type.
